# Supplementary material for: Isotopic Signatures of Microbial Mg-Carbonates Deposited in an Ephemeral Hyperalkaline Lake (Central Spain): Paleoenvironmental Implications
Source: MDPI journal article supplement (doi:10.3390/min13050617), 2023-04-28
Supplement: s1 [file s1]

# Supplementary Material: Isotopic Signatures of Microbial Mg-Carbonates Deposited in an Ephemeral Hyperalkaline Lake (Central Spain): Paleoenvironmental Implications

María E. Sanz-Montero \*, Pablo del Buey, Óscar Cabestrero and Mónica Sánchez-Román

**Table S1.** List of studied samples including the name (Sample ID = Sample identification) and the type of sample. EPS = Extracellular polymeric substances.

| Sample ID                      | Sample Type                                                                           |
|--------------------------------|---------------------------------------------------------------------------------------|
| Cw-1 to Cw-3                   | Surface water (* filtered)                                                            |
| Cw-4                           | Porewater                                                                             |
| Ccd-1 to Ccd-9, 11 and 12      | Wet sediment (cd= calcite + dolomite; d= dolomite)                                    |
| Cs-1 to Csd-3                  | Core sediment (s= calcite + dolomite; sd= dolomite)                                   |
| Cm-1 to Cm-5, Ccd-10 and Cd-10 | Dry sediment (m= magnesite bearing assemblage; cd = calcite + dolomite; d = dolomite) |
| Ceps-1 to Ceps-2*              | non-purified EPS (* purified)                                                         |

**Table S2.** Variation of the physicochemical values in the surface waters of the Lake Caballo Alba (taken from Del Buey and Sanz-Montero, 2022 [10]): temperature (T), pH, dissolved oxygen (DO), salinity (S) and oxidation-reduction potential (ORP).

| Date   | Water Parameters |      |        |                        |          |
|--------|------------------|------|--------|------------------------|----------|
|        | T (°C)           | pH   | DO (%) | S (g·L <sup>-1</sup> ) | ORP (mV) |
| Mar-17 | 24               | 9    | 79.3   | 16                     | 31.6     |
| Apr-18 | 18               | 9.7  | 46.3   | 1.2                    | 46.3     |
| dic-18 | 7.5              | 10.4 | 35.7   | 3.5                    | −149.8   |
| Mar-19 | 17.6             | 9.6  | 90.3   | 6.5                    | −368.6   |
| Apr-21 | 16.2             | 9.8  | 122.8  | 1.9                    | −37      |

**Table S3.** Type of analysis carried out on each sample. XRD: X-Ray diffraction, SEM: Scanning Electron Microscopy, DNA: Genomic Analyses, SI: Stable Isotopes, HC: Hydrogeochemistry.

| Sample ID | XRD | SEM | DNA | SI | HC |
|-----------|-----|-----|-----|----|----|
| Ccd-1     | x   | –   | –   | x  | –  |
| Ccd-2     | x   | –   | –   | x  | –  |
| Ccd-3     | x   | –   | –   | x  | –  |
| Ccd-4     | x   | x   | –   | x  | –  |
| Cd-4      | x   | –   | –   | x  | –  |
| Ccd-5     | x   | x   | –   | x  | –  |
| Cd-5      | x   | –   | –   | x  | –  |
| Cs-1      | x   | –   | –   | x  | –  |
| Csd-1     | x   | –   | –   | x  | –  |
| Cs-2      | x   | –   | –   | x  | –  |
| Cs-3      | x   | –   | –   | x  | –  |
| Csd-3     | x   | –   | –   | x  | –  |

|         |   |   |   |   |   |
|---------|---|---|---|---|---|
| Ccd-6   | x | – | – | x | – |
| Ccd-7   | x | – | – | x | – |
| Ccd-8   | x | x | – | x | – |
| Ccd-9   | x | – | – | x | – |
| Ccd-10  | x | x | – | x | – |
| Cd-10   | x | – | – | x | – |
| Ccd-11  | x | X | x | x | – |
| Ccd-12  | x | x | x | x | – |
| Cm-1    | x | x | – | x | – |
| Cm-2    | x | – | – | x | – |
| Cm-3    | x | – | – | x | – |
| Cm-4    | x | x | – | x | – |
| Cm-5    | x | – | – | x | – |
| Ceps-1  | x | – | – | x | – |
| Ceps-1* | x | – | – | x | – |
| Ceps-2  | x | – | – | x | – |
| Ceps-2* | x | – | – | x | – |
| Cw-1    | – | – | – | x | x |
| Cw-2    | – | – | – | x | x |
| Cw-2*   | – | – | – | x | x |
| Cw-3    | – | – | – | x | x |
| Cw-4    | – | – | – | x | x |
